# Supplementary material
Source: PubMed Central journal article supplement (PMC4561706)
Supplement: AEM.01639-15_zam999116590so1.pdf [file AEM.01639-15_zam999116590so1.pdf]

## **Supporting Information**

### **Table of Contents**

#### **Supplementary Methods**

Stereochemistry of the Amino Acids

Antibacterial and Antiviral Activities

Assay of the antifungal activities against mycelium growth of *F. oxysporum*

Evaluation of hemolytic activities

#### **Supplementary Tables**

Table S1: Summary of the open reading frames of the locillomycin gene cluster

Table S2: Adenylation domain substrate specificity predicted and determined

Table S3: MS characteristics of the fragment of Locillomycin-A

Table S4: MS characteristics of the fragment of Locillomycin-B

Table S5: MS characteristics of the fragment of Locillomycin-C

Table S6:  $^1\text{H}$  and  $^{13}\text{C}$  data of locillomycin C in  $\text{CD}_3\text{OH}$

Table S7: NMR data of locillomycin A (in 90%  $\text{H}_2\text{O}$ /10%  $\text{D}_2\text{O}$ ) and locillomycin B (in  $\text{CD}_3\text{OH}$ )

#### **Supplementary Figures**

Figure S1. The locations of five PKS gene clusters and four NRPS gene clusters in the *B. subtilis* 916 genome.

Figure S2. Southern blot analysis neomycin resistance genes of the *B. subtilis* 916 and its mutants.

Figure S3. HPLC chromatograms for locillomycins produced by wild-type *B. subtilis* 916 and its mutants.

Figure S4. Isolation and purification of locillomycins.

Figure S5. Sequential assignment and spin system identification of the cyclic peptide

Left panel shows the fingerprint region of the ROESY spectrum of the locillomycin C peptide moiety.

Figure S6. Tandem mass spectrum of locillomycin A

Figure S7. Tandem mass spectrum of locillomycin B

Figure S8. Tandem mass spectrum of locillomycin C

Figure S9. DL-amino acid analysis of locillomycins by HPLC

Figure S10. Chemical structure of locillomycins A, B and C

Figure S11. Antibacterial and antiviral activities of locillomycins.

Figure S12. Haemolytic activities of locillomycins and surfactins.

## **Supplementary Methods**

### **Stereochemistry of the Amino Acids**

Amino acid chirality was determined by reacting acid hydrolysates of the locillomycins with o-phthaldialdehyde (OPA) together with N-isobutyryl-L-cysteine (IBLC) as chiral reagents.<sup>1</sup> Briefly, locillomycins were hydrolyzed with 6 M HCl containing 1% phenol at 110 °C for 24 h. After hydrolysis, the samples were cooled and dried for further analysis. 260 mM IBLC and 170 mM OPA in 1 M potassium borate buffer of pH 10.4 were used as derivatization reagent. 50 µL 0.4 M sodium borate buffer of pH 10.4, 10 µL OPA/IBLC reagent, 22 µL samples or amino acid standard solution before injections on a reversed-phase column (RP-18, 5 µm, 4 × 250 mm; Merck). Mobile phase: eluent A, 23 mM sodium acetate, adjusted to pH 6.0 by addition of 10% acetic acid; eluent B, methanol/acetonitrile (600 mL + 50 mL); linear gradient, 0% B to 53.5% B in 90 min at a flow rate at 0.5 mL/min; then 100% B for 10 min followed by 100% A for 5 min.

### **Assay of the antifungal activities against mycelium growth of *F. oxysporum*.**

The fungal strains were cultured at 28 °C on potato dextrose agar (PDA) medium containing (per liter) 200 g of potato infusion, 20 g of glucose, and 20 g of agar (pH 7.0). The wild-type and mutant strains antifungal activities against mycelium growth of *F. oxysporum* was performed as follows. Mycelia plugs (5 mm) of *F. oxysporum* were deposited in the center of the plates at equal distances from the wells. 5 µL portions of culture strains were deposited on both sides at a distance 2.5 cm from the rims of mycelia plugs. The plates were inoculated at 28 °C, and inhibition zones were measured after 3 to 7 days.

### **Antibacterial and Antiviral Activities**

The antibacterial activities of the purified antibiotics were determined by MIC which takes into account the higher dilution of antibiotics at which no growth of the test bacteria was visible.<sup>2</sup> The bacteria used for the test were *Staphylococcus aureus* and *Xanthomonas oryzae* pv. *oryzae*. The antiviral activities of the purified antibiotics against porcine epidemic diarrhea (PED) virus were performed according to a previous report.<sup>3</sup> Briefly, Vero cells seeded with complete confluent condition were infected with PED virus at a multiplicity of infection (0.01 MOI) with or without locillomycins extract at 0, 24, 40, and 48 h post infection. The number of viruses was

determined by quantitative Real-Time PCR. Total RNA was isolated and used for cDNA synthesis. Real-time PCR was performed by subjecting the reaction mixtures to initial denaturation at 94 °C for 3 min, followed by 40 cycles of 94 °C for 20 s, 65 °C for 20 s, and 72 °C for 30 s. The primers PEDF and PEDR specific for Nucleocapsid gene of PED virus are used for PCR (Table S7).

**Evaluation of hemolytic activities.** To evaluate the hemolytic activities of the wild-type *B. subtilis* 916 and the mutants, strains were streaking inoculated on the blood agar plates with 5% defibrinated sheep blood. Hemolytic activities were visualized by development of a clear halo around the growth of the strains after incubation at 37 °C for 1 – 4 days. In all cases, three replicate plates were used for each strain and the experiment was repeated once.

- (1) Words, K. *Chromatographia* **1991**, 32, 383–388.
- (2) Leclere, V.; Bechet, M.; Adam, A.; Guez, J.-S.; Wathelet, B.; Ongena, M.; Thonart, P.; Gancel, F.; Chollet-Imbert, M.; Jacques, P. *Applied Environ. Microbiol.* **2005**, 71, 4577–4584.
- (3) Cho, W.-K.; Kim, H.; Choi, Y. J.; Yim, N.-H.; Yang, H. J.; Ma, J. Y. *Evid. Based Complement. Alternat. Med.* **2012**, 2012, 985151.

## Supplementary Tables

Table S1: Summary of the open reading frames of the locillomycin gene cluster

| ORF   | No. of aa | Protein homology (NCBI No.)                                                                                                                                                 | Percentage of aa identity |
|-------|-----------|-----------------------------------------------------------------------------------------------------------------------------------------------------------------------------|---------------------------|
| ybbR  | 479       | <i>Bacillus amyloliquefaciens</i> FZB42 conserved hypothetical protein YbbR (ABS72628.1)(479 aa)                                                                            | 100                       |
| ybbT  | 455       | <i>Bacillus amyloliquefaciens</i> FZB42 putative phosphoglucomutase YbbT (ABS72629.1)(448 aa)                                                                               | 96                        |
| glmS  | 600       | <i>Bacillus amyloliquefaciens</i> FZB42 l-glutamine-D-fructose-6-phosphate amidotransferase (ABS72631.1) (600 aa)                                                           | 100                       |
| Orf1  | 291       | <i>Bacillus amyloliquefaciens</i> FZB42 putative ATP binding protein of ABC transporter (ABS72632.1) (290 aa)                                                               | 98                        |
| locD  | 1293      | <i>Paenibacillus polymyxa</i> E681 polyketide synthase module containing protein (ADM70188.1)(2029 aa)                                                                      | 40                        |
| LocA  | 2325      | <i>Aneurinibacillus migulanus</i> Gramicidin S synthase II(P0C063.2) (4451 aa)                                                                                              | 40                        |
| LocB  | 3868      | <i>Paenibacillus mucilaginosus</i> K02 fusaricidin synthetase ( YP_006190135.2)(6737 aa)                                                                                    | 48                        |
| LocC  | 2126      | <i>Brevibacillus brevis</i> NBRC 100599 tyrocidine synthetase III (YP_002772270.1)(6487 aa)                                                                                 | 42                        |
| Orf3  | 227       | <i>Bacillus amyloliquefaciens</i> FZB42 member of the two component signal transduction system containing the sensor IM histidine kinase, RBAM_002380 (ABS72637.1 )(227 aa) | 100                       |
| Orf4  | 340       | <i>Bacillus amyloliquefaciens</i> FZB42 membrane bound sensor kinase; probably linked with the response regulator RBAM002380 (ABS72638.1)(340)                              | 98                        |
| Orf5  | 254       | <i>Bacillus amyloliquefaciens</i> FZB42 putative ABC-type antimicrobial peptidetransport system, ATPase (ABS72639.1)(254 aa)                                                | 98                        |
| Orf6  | 642       | <i>Bacillus amyloliquefaciens</i> FZB42 putative ABC-type transport system,permease(ABS72640.1)(642 aa)                                                                     | 97                        |
| Orf7  | 1010      | <i>Bacillus methanolicus</i> Multidrug transporter AcrB (WP 004433265.1)(1001 aa)                                                                                           | 61                        |
| kdgR1 | 281       | <i>Bacillus amyloliquefaciens</i> FZB42 putative 2,5-diketo-D-gluconic acid reductase KdgR1 (ABS72642.1) (281 aa)                                                           | 98                        |

Note: aa, amino acid.

<sup>a</sup>The closest homologs were based on NCBI searches conducted July 8, 2013.

Table S2: Adenylation domain substrate specificity predicted and determined

| A domain | Selectivity-conferring amino acid at position |     |     |     |     |     |     |     |     |     | Amino acids            |                     |
|----------|-----------------------------------------------|-----|-----|-----|-----|-----|-----|-----|-----|-----|------------------------|---------------------|
|          | 235                                           | 236 | 239 | 278 | 299 | 301 | 322 | 330 | 331 | 517 | Predicted <sup>a</sup> | Proved <sup>b</sup> |
| LocA1    | D                                             | F   | W   | N   | I   | G   | M   | V   | H   | K   | Thr                    | Thr                 |
| LocB1    | D                                             | A   | V   | Q   | M   | D   | C   | V   | D   | K   | Asp/Asn/Glu/Gln        | Gln/Asn             |
| LocB2    | D                                             | L   | T   | K   | I   | G   | H   | I   | G   | K   | Asp/Asn/Glu/Gln        | Asp                 |
| LocB3    | D                                             | I   | L   | Q   | Y   | G   | M   | I   | W   | K   | Gly/Ala                | Gly                 |
| LocC1    | D                                             | G   | L   | F   | T   | V   | R   | V   | E   | K   | tyr                    | tyr                 |
| LocC2    | D                                             | A   | F   | W   | I   | G   | A   | T   | F   | K   | val/leu/ile            | val                 |

<sup>a</sup> Comparison of the adenylation domain specificity with known nonribosomal peptide natural products.

<sup>b</sup> The internal denylation domain were investigated in terms of activity in the ATP-PPi exchange reaction with the amino acids of locillomycin and a control without amino acid.

Table S3: MS characteristics of the fragment of Locillomycin-A

| Molecule Weight | Relative Abundance | Molecule Formula                                                | Sequence                                              |
|-----------------|--------------------|-----------------------------------------------------------------|-------------------------------------------------------|
| 212.1           | 53                 | C <sub>13</sub> H <sub>26</sub> O <sub>1</sub> N <sub>1</sub>   | CH <sub>3</sub> (CH <sub>2</sub> ) <sub>11</sub> CONH |
| 221.1           | 105                | C <sub>11</sub> H <sub>13</sub> N <sub>2</sub> O <sub>3</sub>   | Gly-Tyr                                               |
| 244.1           | 74                 | C <sub>9</sub> H <sub>14</sub> N <sub>3</sub> O <sub>5</sub>    | Gln-Asp                                               |
| 280.3           | 268                | C <sub>14</sub> H <sub>22</sub> N <sub>3</sub> O <sub>3</sub>   | Tyr-Val                                               |
| 297.1           | 51                 | C <sub>17</sub> H <sub>33</sub> N <sub>2</sub> O <sub>2</sub>   | Thr(Link)                                             |
| 301.3           | 50                 | C <sub>11</sub> H <sub>17</sub> N <sub>4</sub> O <sub>6</sub>   | Gln-Asp-Gly                                           |
| 336.3           | 60                 | C <sub>15</sub> H <sub>18</sub> N <sub>3</sub> O <sub>6</sub>   | Asp-Gly-Tyr                                           |
| 397.4           | 55                 | C <sub>22</sub> H <sub>41</sub> N <sub>2</sub> O <sub>4</sub>   | Val-Thr(Link)                                         |
| 398.2           | 63                 | C <sub>21</sub> H <sub>40</sub> N <sub>3</sub> O <sub>4</sub>   | Thr(Link)-Gln                                         |
| 402.1           | 54                 | C <sub>14</sub> H <sub>20</sub> N <sub>5</sub> O <sub>9</sub>   | Asp-Gly-Asn-Asp                                       |
| 415.4           | 81                 | C <sub>15</sub> H <sub>23</sub> N <sub>6</sub> O <sub>8</sub>   | Gln-Asp-Gly-Asn                                       |
| 459.2           | 47                 | C <sub>16</sub> H <sub>23</sub> N <sub>6</sub> O <sub>10</sub>  | Asp-Gly-Asn-Asp-Gly                                   |
| 507.1           | 72                 | C <sub>21</sub> H <sub>27</sub> N <sub>6</sub> O <sub>9</sub>   | Gly-Asn-Asp-Gly-Thr                                   |
| 530.2           | 277                | C <sub>19</sub> H <sub>28</sub> N <sub>7</sub> O <sub>11</sub>  | Gln-Asp-Gly-Asn-Asp                                   |
| 587.1           | 106                | C <sub>21</sub> H <sub>31</sub> N <sub>8</sub> O <sub>12</sub>  | Gln-Asp-Gly-Asn-Asp-Gly                               |
| 622.2           | 97                 | C <sub>25</sub> H <sub>32</sub> N <sub>7</sub> O <sub>12</sub>  | Asp-Gly-Asn-Asp-Gly-Tyr                               |
| 640.4           | 74                 | C <sub>31</sub> H <sub>54</sub> N <sub>5</sub> O <sub>9</sub>   | Val-Thr(Link)-Gln-Asp                                 |
| 688             | 69                 | C <sub>36</sub> H <sub>58</sub> N <sub>5</sub> O <sub>8</sub>   | Tyr-Val-Thr(Link)-Gln                                 |
| 721.2           | 83                 | C <sub>30</sub> H <sub>41</sub> N <sub>8</sub> O <sub>13</sub>  | Asp-Gly-Asn-Asp-Gly-Tyr-Val                           |
| 732.1           | 49                 | C <sub>37</sub> H <sub>58</sub> N <sub>5</sub> O <sub>10</sub>  | Asp-Gly-Tyr-Val-Thr(Link)                             |
| 750.3           | 51                 | C <sub>30</sub> H <sub>40</sub> N <sub>9</sub> O <sub>14</sub>  | Gln-Asp-Gly-Asn-Asp-Gly-Thr                           |
| 849.4           | 193                | C <sub>35</sub> H <sub>49</sub> N <sub>10</sub> O <sub>15</sub> | Gln-Asp-Gly-Asn-Asp-Gly-Tyr-Val                       |
| 860.5           | 52                 | C <sub>42</sub> H <sub>66</sub> N <sub>7</sub> O <sub>12</sub>  | Tyr-Val-Thr(Link)-Gln-Asp-Gly                         |
| 884.4           | 50                 | C <sub>38</sub> H <sub>62</sub> N <sub>9</sub> O <sub>15</sub>  | Thr(Link)-Gln-Asp-Gly-Asn-Asp-Gly3                    |
| 975.6           | 41                 | C <sub>46</sub> H <sub>71</sub> N <sub>8</sub> O <sub>15</sub>  | Asp-Gly-Tyr-Val-Thr(Link)-Gln-Asp                     |
| 983.6           | 47                 | C <sub>43</sub> H <sub>71</sub> N <sub>10</sub> O <sub>16</sub> | Val-Thr(Link)-Gln-Asp-Gly-Asn-Asp                     |
| 1146.6          | 404                | C <sub>52</sub> H <sub>80</sub> N <sub>11</sub> O <sub>18</sub> | locillomycin A+H                                      |

Thr(link): represents the amino of a Thr reacting with the fatty acid (CH<sub>3</sub>(CH<sub>2</sub>)<sub>11</sub>COOH) to form an amide bond.

Table S4: MS fragment characteristics of Locillomycin B

| Molecule Weight | Relative Abundance | Molecule Formula                                                | Sequence                          |
|-----------------|--------------------|-----------------------------------------------------------------|-----------------------------------|
| 221             | 47                 | C <sub>11</sub> H <sub>13</sub> N <sub>2</sub> O <sub>3</sub>   | Gly-Tyr                           |
| 244             | 87                 | C <sub>9</sub> H <sub>14</sub> N <sub>3</sub> O <sub>5</sub>    | Gln-Asp                           |
| 287.1           | 48                 | C <sub>10</sub> H <sub>15</sub> N <sub>4</sub> O <sub>6</sub>   | Asn-Asp-Gly                       |
| 336.1           | 81                 | C <sub>15</sub> H <sub>18</sub> N <sub>3</sub> O <sub>6</sub>   | Asp-Gly-Tyr                       |
| 402.4           | 56                 | C <sub>14</sub> H <sub>20</sub> N <sub>5</sub> O <sub>9</sub>   | Asp-Gly-Tyr-Asp                   |
| 415             | 54                 | C <sub>15</sub> H <sub>23</sub> N <sub>6</sub> O <sub>8</sub>   | Gln-Asp-Gly-Asn                   |
| 507.3           | 61                 | C <sub>21</sub> H <sub>27</sub> N <sub>6</sub> O <sub>9</sub>   | Gly-Asn-Asp-Gly-Tyr               |
| 587.2           | 99                 | C <sub>21</sub> H <sub>31</sub> N <sub>8</sub> O <sub>12</sub>  | Gln-Asp-Gly-Asn-Asp-Gly           |
| 603.9           | 76                 | C <sub>33</sub> H <sub>55</sub> N <sub>4</sub> O <sub>6</sub>   | Gly-Tyr-Val-Thr(Link)             |
| 622             | 130                | C <sub>25</sub> H <sub>32</sub> N <sub>7</sub> O <sub>12</sub>  | Asp-Gly-Asn-Asp-Gly-Tyr           |
| 721.2           | 94                 | C <sub>30</sub> H <sub>41</sub> N <sub>8</sub> O <sub>13</sub>  | Asp-Gly-Asn-Asp-Gly-Tyr-Val       |
| 750.1           | 45                 | C <sub>30</sub> H <sub>40</sub> N <sub>9</sub> O <sub>14</sub>  | Gln-Asp-Gly-Asn-Asp-Gly-Tyr       |
| 832.1           | 63                 | C <sub>41</sub> H <sub>66</sub> N <sub>7</sub> O <sub>11</sub>  | Asn-Asp-Gly-Tyr-Val-Thr(Link)     |
| 849.3           | 233                | C <sub>35</sub> H <sub>49</sub> N <sub>10</sub> O <sub>15</sub> | Gln-Asp-Gly-Asn-Asp-Gly-Tyr-Val   |
| 898.7           | 89                 | C <sub>39</sub> H <sub>64</sub> N <sub>9</sub> O <sub>15</sub>  | Thr(Link)-Gln-Asp-Gly-Asn-Asp-Gly |
| 917.5           | 80                 | C <sub>44</sub> H <sub>69</sub> N <sub>8</sub> O <sub>13</sub>  | Gly-Asn-Asp-Gly-Tyr-Val-Thr(Link) |
| 940.1           | 50                 | C <sub>42</sub> H <sub>70</sub> N <sub>9</sub> O <sub>15</sub>  | Val-Thr(Link)-Gln-Asp-Gly-Asn-Asp |
| 1160.6          | 366                | C <sub>53</sub> H <sub>82</sub> N <sub>11</sub> O <sub>18</sub> | locillomycin B+H                  |

Thr(link): represent the amino of a Thr reacted with the fatty acid (CH<sub>3</sub>(CH<sub>2</sub>)<sub>12</sub>COOH) to form amide bond.

Table S5: MS fragment characteristics of Locillomycin C

| Molecule Weight | Relative Abundance | Molecule Formula                                                | Sequence                          |
|-----------------|--------------------|-----------------------------------------------------------------|-----------------------------------|
| 172.2           | 62                 | C <sub>6</sub> H <sub>10</sub> N <sub>3</sub> O <sub>3</sub>    | Gly-Asn                           |
| 221             | 190                | C <sub>11</sub> H <sub>13</sub> N <sub>2</sub> O <sub>3</sub>   | Gly-Tyr                           |
| 230.1           | 49                 | C <sub>8</sub> H <sub>12</sub> N <sub>3</sub> O <sub>5</sub>    | Asn-Asp                           |
| 244             | 303                | C <sub>9</sub> H <sub>14</sub> N <sub>3</sub> O <sub>5</sub>    | Gln-Asp                           |
| 287.1           | 181                | C <sub>10</sub> H <sub>15</sub> N <sub>4</sub> O <sub>6</sub>   | Asn-Asp-Gly                       |
| 301.2           | 106                | C <sub>11</sub> H <sub>17</sub> N <sub>4</sub> O <sub>6</sub>   | Gln-Asp-Gly                       |
| 326             | 87                 | C <sub>19</sub> H <sub>36</sub> N <sub>1</sub> O <sub>3</sub>   | Thr(Link)                         |
| 336             | 94                 | C <sub>15</sub> H <sub>18</sub> N <sub>3</sub> O <sub>6</sub>   | Asp-Gly-Tyr                       |
| 344.1           | 50                 | C <sub>12</sub> H <sub>18</sub> N <sub>5</sub> O <sub>7</sub>   | Gly-Asn-Asp-Gly                   |
| 402.2           | 69                 | C <sub>14</sub> H <sub>20</sub> N <sub>5</sub> O <sub>9</sub>   | Asp-Gly-Asn-Asp                   |
| 415.2           | 100                | C <sub>15</sub> H <sub>23</sub> N <sub>6</sub> O <sub>8</sub>   | Gln-Asp-Gly-Asn                   |
| 425.2           | 79                 | C <sub>24</sub> H <sub>45</sub> N <sub>2</sub> O <sub>4</sub>   | Val-Thr(Link)                     |
| 450.1           | 65                 | C <sub>19</sub> H <sub>24</sub> N <sub>5</sub> O <sub>8</sub>   | Asn-Asp-Gly-Tyr                   |
| 459.1           | 51                 | C <sub>16</sub> H <sub>23</sub> N <sub>6</sub> O <sub>10</sub>  | Asp-Gly-Asn-Asp                   |
| 507.1           | 59                 | C <sub>21</sub> H <sub>27</sub> N <sub>6</sub> O <sub>9</sub>   | Gly-Asn-Asp-Gly-Tyr               |
| 530             | 124                | C <sub>19</sub> H <sub>28</sub> N <sub>7</sub> O <sub>11</sub>  | Gln-Asp-Gly-Asn-Asp               |
| 553             | 192                | C <sub>29</sub> H <sub>53</sub> N <sub>4</sub> O <sub>6</sub>   | Val-Thr(Link)-Gln                 |
| 569.3           | 99                 | C <sub>28</sub> H <sub>49</sub> N <sub>4</sub> O <sub>8</sub>   | Thr(Link)-Gln-Asp                 |
| 587             | 79                 | C <sub>21</sub> H <sub>31</sub> N <sub>8</sub> O <sub>12</sub>  | Gln-Asp-Gly-Asn-Asp-Gly           |
| 588.4           | 72                 | C <sub>33</sub> H <sub>54</sub> N <sub>3</sub> O <sub>6</sub>   | Tyr-Val-Thr(Link)                 |
| 622.1           | 72                 | C <sub>25</sub> H <sub>32</sub> N <sub>7</sub> O <sub>12</sub>  | Asp-Gly-Asn-Asp-Gly               |
| 716.1           | 52                 | C <sub>38</sub> H <sub>62</sub> N <sub>5</sub> O <sub>8</sub>   | Tyr-Val-Thr(Link)-Gln             |
| 849.2           | 165                | C <sub>35</sub> H <sub>49</sub> N <sub>10</sub> O <sub>15</sub> | Gln-Asp-Gly-Asn-Asp-Gly-Tyr-Val   |
| 912.2           | 61                 | C <sub>40</sub> H <sub>66</sub> N <sub>9</sub> O <sub>15</sub>  | Thr(Link)-Gln-Asp-Gly-Asn-Asp-Gly |
| 931.8           | 60                 | C <sub>45</sub> H <sub>71</sub> N <sub>8</sub> O <sub>13</sub>  | Gly-Asn-Asp-Gly-Tyr-Val-Thr(Link) |
| 1174.6          | 69                 | C <sub>54</sub> H <sub>84</sub> N <sub>11</sub> O <sub>18</sub> | LocillomycinC+H                   |

Thr (link): represents the amino of a Thr reacted with the fatty acid (CH<sub>3</sub>(CH<sub>2</sub>)<sub>13</sub>COOH) to form amide bond.

Table S6:  $^1\text{H}$  and  $^{13}\text{C}$  data of locillomycin C in  $\text{CD}_3\text{OH}$ 

|                |                     | $\delta_{\text{H}}$ (ppm) | $\delta_{\text{C}}$ (ppm) | HMBC                                                                                                     |
|----------------|---------------------|---------------------------|---------------------------|----------------------------------------------------------------------------------------------------------|
| Cyclic peptide |                     |                           |                           |                                                                                                          |
| Thr 1          | $\alpha$            | 4.75                      | 57.43                     | 1'; Thr1- $\text{C}_\beta$ , $\text{C}'$                                                                 |
|                | $\beta$             | 5.48                      | 72.14                     | Val9- $\text{C}'$                                                                                        |
|                | $\gamma$            | 1.19                      | 16.79                     | Val9- $\text{C}_\alpha$ , $\text{C}_\beta$                                                               |
|                | $\text{H}_\text{N}$ | 8.33                      | --                        | 1'; Thr1- $\text{C}_\alpha$                                                                              |
|                | $\text{C}'$         | --                        | 171.08                    |                                                                                                          |
| Gln 2          | $\alpha$            | 4.30                      | 54.68                     | Thr1- $\text{C}'$ ; Gln2- $\text{C}_\beta$ , $\text{C}_\gamma$ , $\text{C}'$                             |
|                | $\beta$             | 1.98, 2.04                | 29.09                     | Gln2- $\text{C}_\alpha$ , $\text{C}_\gamma$ , $\text{C}_\delta$ , $\text{C}'$                            |
|                | $\gamma$            | 2.25                      | 32.07                     | Gln2- $\text{C}_\alpha$ , $\text{C}_\beta$ , $\text{C}_\delta$                                           |
|                | $\delta$            | --                        | 177.74                    |                                                                                                          |
|                | $\epsilon$          | 6.65, 7.64                | --                        | Gln2- $\text{C}_\gamma$ , $\text{C}_\delta$                                                              |
|                | $\text{H}_\text{N}$ | 8.01                      | --                        | Thr1- $\text{C}'$                                                                                        |
|                | $\text{C}'$         | --                        | 173.24                    |                                                                                                          |
| Asp 3          | $\alpha$            | 4.63                      | 53.04                     | Gln2- $\text{C}'$ ; Asp3- $\text{C}_\beta$ , $\text{C}_\gamma$ , $\text{C}'$                             |
|                | $\beta$             | 2.65, 2.69                | 39.81                     | Asp3- $\text{C}_\alpha$ , $\text{C}_\gamma$ , $\text{C}'$                                                |
|                | $\gamma$            | --                        | 177.37                    |                                                                                                          |
|                | $\text{H}_\text{N}$ | 8.56                      | --                        | Gln2- $\text{C}'$                                                                                        |
|                | $\text{C}'$         | --                        | 174.97                    |                                                                                                          |
| Gly 4          | $\alpha$            | 3.92, 3.80                | 43.90                     | Asp3- $\text{C}'$ ; Gly4- $\text{C}'$                                                                    |
|                | $\text{H}_\text{N}$ | 8.20                      | --                        | Asp3- $\text{C}'$                                                                                        |
|                | $\text{C}'$         | --                        | 173.10                    |                                                                                                          |
| Asn 5          | $\alpha$            | 4.51                      | 54.14                     | Gly4- $\text{C}'$ ; Asn5- $\text{C}_\beta$ , $\text{C}'$                                                 |
|                | $\beta$             | 2.76                      | 37.14                     | Asn5- $\text{C}_\alpha$ , $\text{C}'$                                                                    |
|                | $\gamma$            | --                        | 174.41                    |                                                                                                          |
|                | $\delta$            | 6.96, 7.83                | --                        |                                                                                                          |
|                | $\text{H}_\text{N}$ | 8.74                      | --                        |                                                                                                          |
| Asp 6          | $\alpha$            | 4.56                      | 53.53                     | Asn5- $\text{C}'$ ; Asp6- $\text{C}_\beta$ , $\text{C}_\gamma$ , $\text{C}'$                             |
|                | $\beta$             | 2.65, 2.76                | 38.57                     | Asp6- $\text{C}_\alpha$ , $\text{C}_\gamma$ , $\text{C}'$                                                |
|                | $\gamma$            | --                        | 177.55                    |                                                                                                          |
|                | $\text{H}_\text{N}$ | 8.47                      | --                        | Asn5- $\text{C}'$                                                                                        |
|                | $\text{C}'$         | --                        | 174.51                    |                                                                                                          |
| Gly 7          | $\alpha$            | 4.09, 3.93                | 43.46                     | Asp6- $\text{C}'$ ; Gly7- $\text{C}'$                                                                    |
|                | $\text{H}_\text{N}$ | 8.04                      | --                        | Asp6- $\text{C}'$                                                                                        |
|                | $\text{C}'$         | --                        | 172.49                    |                                                                                                          |
| Tyr 8          | $\alpha$            | 4.41                      | 58.05                     | Gly7- $\text{C}'$ ; Tyr8- $\text{C}_\beta$ , $\text{C}_\gamma$ , $\text{C}'$                             |
|                | $\beta$             | 2.98, 3.12                | 37.43                     | Tyr8- $\text{C}_\alpha$ , $\text{C}_\gamma$ , $\text{C}_\delta$ , $\text{C}'$                            |
|                | $\gamma$            | --                        | 129.49                    |                                                                                                          |
|                | $\delta$            | 7.16                      | 131.23                    | Tyr8- $\text{C}_\beta$ , $\text{C}_\epsilon$ , $\text{C}_\zeta$                                          |
|                | $\epsilon$          | 6.69                      | 116.35                    | Tyr 8- $\text{C}_\gamma$ , $\text{C}_\delta$ , $\text{C}_\zeta$                                          |
|                | $\zeta$             | --                        | 157.24                    |                                                                                                          |
|                | $\text{H}_\text{N}$ | 7.92                      | --                        | Gly7- $\text{C}'$ ; Tyr 8- $\text{C}_\alpha$ , $\text{C}_\beta$                                          |
| Val 9          | $\text{C}'$         | --                        | 174.05                    |                                                                                                          |
|                | $\alpha$            | 4.22                      | 59.99                     | Tyr8- $\text{C}'$ ; Val9- $\text{C}_\beta$ , $\text{C}_{\gamma 1}$ , $\text{C}_{\gamma 2}$ , $\text{C}'$ |
|                | $\beta$             | 2.07                      | 31.19                     | Val9- $\text{C}_\alpha$ , $\text{C}'$                                                                    |
|                | $\gamma 1$          | 0.84                      | 19.18                     | Val9- $\text{C}_\alpha$ , $\text{C}_\beta$ , $\text{C}_{\gamma 2}$                                       |
|                | $\gamma 2$          | 0.88                      | 18.61                     | Val9- $\text{C}_\alpha$ , $\text{C}_\beta$ , $\text{C}_{\gamma 1}$                                       |
|                | $\text{H}_\text{N}$ | 7.53                      | --                        |                                                                                                          |
| Acyl group     | $\text{C}'$         | --                        | 171.32                    |                                                                                                          |
|                | 1'                  | --                        | 177.27                    |                                                                                                          |
|                | 2'                  | 2.41                      | 36.84                     | 1'; 3'; 4'                                                                                               |
|                | 3'                  | 1.63                      | 27.14                     | 1'; 2'; 4'                                                                                               |
|                | 4'-13'              | 1.2~1.4                   | 30.3~31.0                 |                                                                                                          |
|                | 14'                 | 1.28                      | 23.69                     | 15'; 13'                                                                                                 |
|                | 15'                 | 0.86                      | 11.71                     | 14'; 13'                                                                                                 |

Note: --: no such nucleus; N/A: assignment not available

Table S7  $^1\text{H}$  and  $^{13}\text{C}$  data of locillomycin A in 90%  $\text{H}_2\text{O}/10\%\text{D}_2\text{O}$  and locillomycin B in  $\text{CD}_3\text{OH}$ 

| Locillomycin A |                           |                           |                       | Locillomycin B            |                           |
|----------------|---------------------------|---------------------------|-----------------------|---------------------------|---------------------------|
|                | $\delta_{\text{H}}$ (ppm) | $\delta_{\text{C}}$ (ppm) |                       | $\delta_{\text{H}}$ (ppm) | $\delta_{\text{C}}$ (ppm) |
| Cyclic peptide |                           |                           |                       |                           |                           |
| Thr 1          | $\alpha$                  | N/A                       | $\alpha$              | 4.75                      | 57.63                     |
|                | $\beta$                   | 5.50                      | $\beta$               | 5.44                      | 71.93                     |
|                | $\gamma$                  | 1.15                      | $\gamma$              | 1.21                      | 16.73                     |
|                | $\text{H}_{\text{N}}$     | 8.34                      | $\text{H}_{\text{N}}$ | 8.38                      | --                        |
|                | $\text{C}'$               | --                        | $\text{C}'$           | --                        | 171.26                    |
| Gln 2          | $\alpha$                  | 4.36                      | $\alpha$              | 4.36                      | 54.06                     |
|                | $\beta$                   | 1.91, 2.05                | $\beta$               | 1.91, 2.06                | 29.38                     |
|                | $\gamma$                  | 2.25                      | $\gamma$              | 2.23                      | 31.87                     |
|                | $\delta$                  | --                        | $\delta$              | --                        | 177.69                    |
|                | $\epsilon$                | 6.73, 7.50                | $\epsilon$            | 6.82, 5.54                | --                        |
|                | $\text{H}_{\text{N}}$     | 8.03                      | $\text{H}_{\text{N}}$ | 8.06                      | --                        |
| Asp 3          | $\text{C}'$               | --                        | $\text{C}'$           | --                        | 173.43                    |
|                | $\alpha$                  | 4.64                      | $\alpha$              | 4.71                      | 52.00                     |
|                | $\beta$                   | 2.62, 2.69                | $\beta$               | 2.77, 2.86                | 36.40                     |
|                | $\gamma$                  | --                        | $\gamma$              | --                        | 174.13                    |
|                | $\text{H}_{\text{N}}$     | 8.62                      | $\text{H}_{\text{N}}$ | 8.70                      | --                        |
| Gly 4          | $\text{C}'$               | --                        | $\text{C}'$           | --                        | 173.97                    |
|                | $\alpha$                  | 3.90, 3.95                | $\alpha$              | 3.93, 3.83                | 43.94                     |
|                | $\text{H}_{\text{N}}$     | 8.35                      | $\text{H}_{\text{N}}$ | 8.17                      | --                        |
|                | $\text{C}'$               | --                        | $\text{C}'$           | --                        | 172.70                    |
| Asn 5          | $\alpha$                  | 4.54                      | $\alpha$              | 4.55                      | 53.58                     |
|                | $\beta$                   | 2.76                      | $\beta$               | 2.74, 2.84                | 36.95                     |
|                | $\gamma$                  | --                        | $\gamma$              | --                        | 174.29                    |
|                | $\delta$                  | 6.93, 7.68                | $\delta$              | 6.99, 7.67                | --                        |
|                | $\text{H}_{\text{N}}$     | 8.63                      | $\text{H}_{\text{N}}$ | 8.64                      | --                        |
|                | $\text{C}'$               | --                        | $\text{C}'$           | --                        | 174.39                    |
| Asp 6          | $\alpha$                  | 4.64                      | $\alpha$              | 4.67                      | 52.76                     |
|                | $\beta$                   | 2.60, 2.72                | $\beta$               | 2.89                      | 35.78                     |
|                | $\gamma$                  | --                        | $\gamma$              | --                        | 174.00                    |
|                | $\text{H}_{\text{N}}$     | 8.51                      | $\text{H}_{\text{N}}$ | 8.49                      | --                        |
|                | $\text{C}'$               | --                        | $\text{C}'$           | --                        | 173.52                    |
| Gly 7          | $\alpha$                  | 3.90, 3.99                | $\alpha$              | 3.96                      | 43.61                     |
|                | $\text{H}_{\text{N}}$     | 7.89                      | $\text{H}_{\text{N}}$ | 8.13                      | --                        |
|                | $\text{C}'$               | --                        | $\text{C}'$           | --                        | 172.22                    |
| Tyr 8          | $\alpha$                  | 4.52                      | $\alpha$              | 4.47                      | 57.69                     |
|                | $\beta$                   | 2.93, 3.08                | $\beta$               | 2.94, 3.14                | 37.29                     |
|                | $\gamma$                  | --                        | $\gamma$              | --                        | 129.44                    |
|                | $\delta$                  | 7.11                      | $\delta$              | 7.16                      | 131.17                    |
|                | $\epsilon$                | 6.79                      | $\epsilon$            | 6.70                      | 116.25                    |
|                | $\zeta$                   | --                        | $\zeta$               | --                        | 157.25                    |
|                | $\text{H}_{\text{N}}$     | 7.82                      | $\text{H}_{\text{N}}$ | 7.87                      | --                        |
|                | $\text{C}'$               | --                        | $\text{C}'$           | --                        | 174.08                    |
| Val 9          | $\alpha$                  | 4.23                      | $\alpha$              | 4.17                      | 60.41                     |
|                | $\beta$                   | 1.99                      | $\beta$               | 2.07                      | 30.87                     |
|                | $\gamma_1$                | 0.77                      | $\gamma_1$            | 0.84                      | 19.18                     |
|                | $\gamma_2$                | 0.75                      | $\gamma_2$            | 0.89                      | 18.71                     |
|                | $\text{H}_{\text{N}}$     | 7.76                      | $\text{H}_{\text{N}}$ | 7.57                      | --                        |
|                | $\text{C}'$               | --                        | $\text{C}'$           | --                        | 171.44                    |
| Acyl group     |                           |                           |                       |                           |                           |
|                | 1'                        | --                        | 1'                    | --                        | 177.48                    |
|                | 2'                        | 2.49                      | 2'                    | 2.41                      | 36.81                     |
|                | 3'                        | 1.62                      | 3'                    | 1.64                      | 27.14                     |
|                | 4'-11'                    | 0.98~1.20                 | 4'-12'                | 1.23~1.35                 | 30.3~31.3                 |
|                | 12'                       | N/A                       | 13'                   | 1.30                      | 23.75                     |
|                | 13'                       | 0.77                      | 14'                   | 0.89                      | 14.47                     |

Note: --: no such nucleus; N/A: assignment not available

## Supplementary Figures

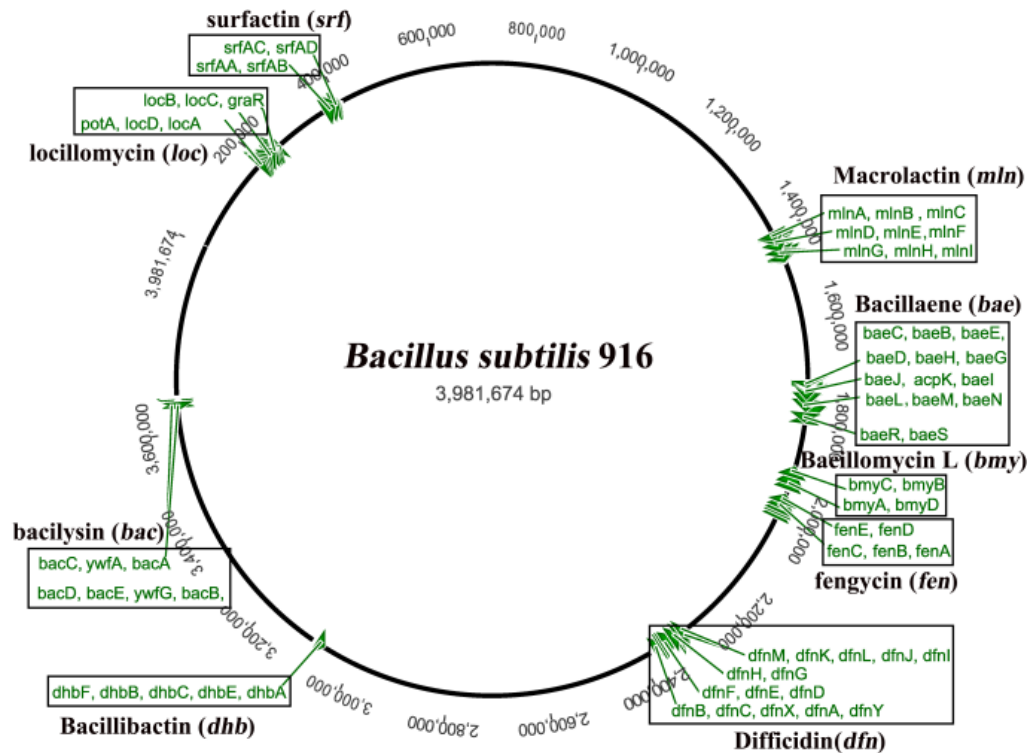

Fig. S1. The locations of five PKS gene clusters and four NRPS gene clusters in the *B. subtilis* 916 genome. The five PKS gene clusters *mln*, *bae*, *dfn*, *dhb* and *bac* are responsible for the biosynthesis of macrolactin, bacillaene, difficidin, bacillibactin and bacilysin respectively. The four NRPS gene cluster *srf*, *bmy*, *loc* and *fen* are responsible for biosynthesis of four family LPs-surfactins, bacillomycin Ls, locillomycins and fengycins respectively.

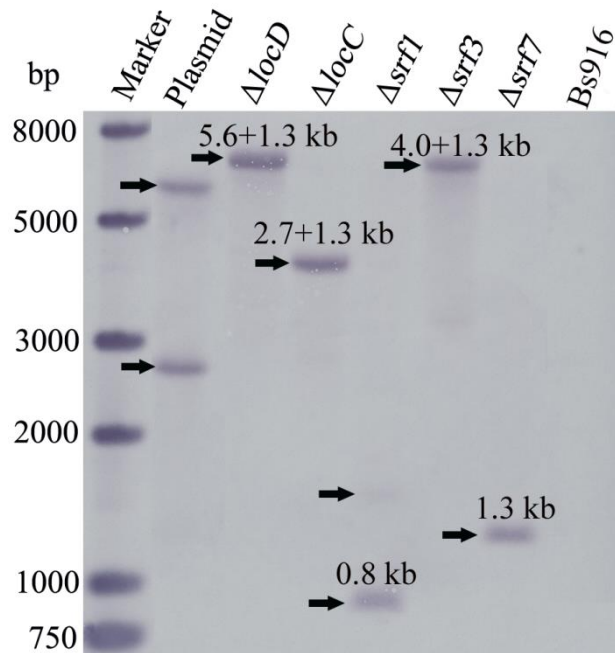

**Figure S2. Southern blot analysis of neomycin resistance genes in *B. subtilis* 916 and its mutants**

Genomic DNA from *B. subtilis* 916 (partially digested with *Sau* 3AI) and its mutants ( $\Delta locD$  digested with *kpn*I and *Afl*III, 6.9 kb;  $\Delta loc$  digested with *Hind*III, 4.0 kb;  $\Delta srf1$  partially digested with *Sau* 3AI;  $\Delta srf3$  digested with *Hind*III, 5.3 kb; and  $\Delta srf7$  digested with *kpn*I, 1.3 kb) and subjected to Southern blotting. The plasmid was the pBEST501 from BGSC. The blot was hybridized with DIG-labelled 0.5 kb PCR product of neomycin resistance gene and probed by detection starter kit II (Roche). Pre-hybridization, hybridization and membrane washing procedures were conducted at 65 °C. The membrane was washed using stringent conditions (twice in  $0.2 \times$  SSC with 0.1% w/v SDS for 20 min) before exposure. Approximate sizes of the observed fragments are indicated on the left of the figure. Two bands of the plasmid lane represented open circular plasmid and super coiled plasmid respectively. The bands of  $\Delta locD$ ,  $\Delta locC$  and  $\Delta srf3$  lanes represented the sums of respective genome DNA fragments (5.6, 2.7 or 4.0 kb) and inserted neomycin cassette (1.3 kb). The band of  $\Delta srf7$  lane represented the neomycin cassette (1.3 kb). The band of  $\Delta srf1$  lane represented the neomycin cassette and around genome DNA sequences partially digested by *Sau* 3AI. No band was observed in lane of Bs916 (*B. subtilis* 916).

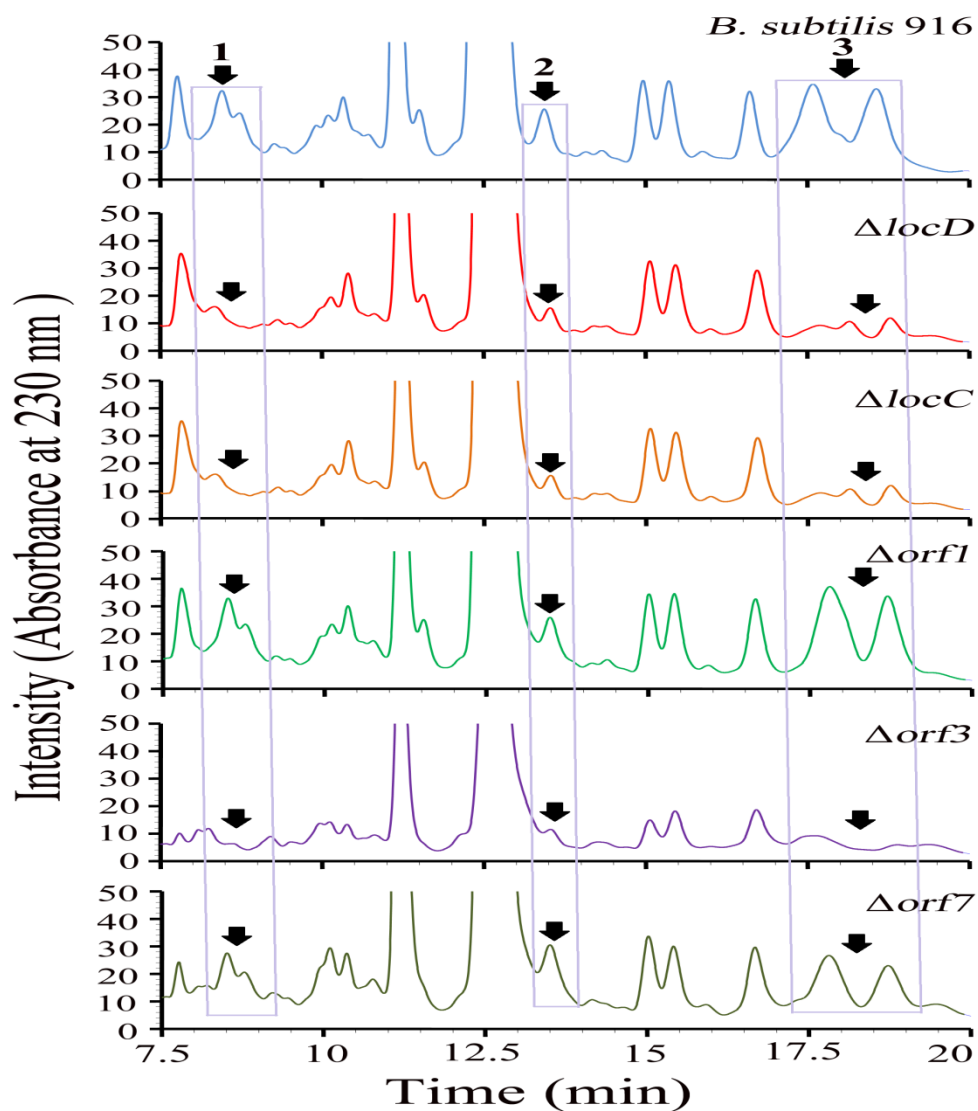

Figure S3. HPLC chromatograms for locillomycins produced by wild-type *B. subtilis* 916 and its mutants. locillomycins A-C were detected in *B. subtilis* 916 broth cultures, but were below detectable level in  $\Delta locD$ ,  $\Delta locC$  and  $\Delta orf3$  broth cultures. The  $\Delta orf1$  and  $\Delta orf7$  mutants showed no significant difference in the production of locillomycin-A, -B and -C when compared to wild-type *B. subtilis* 916.

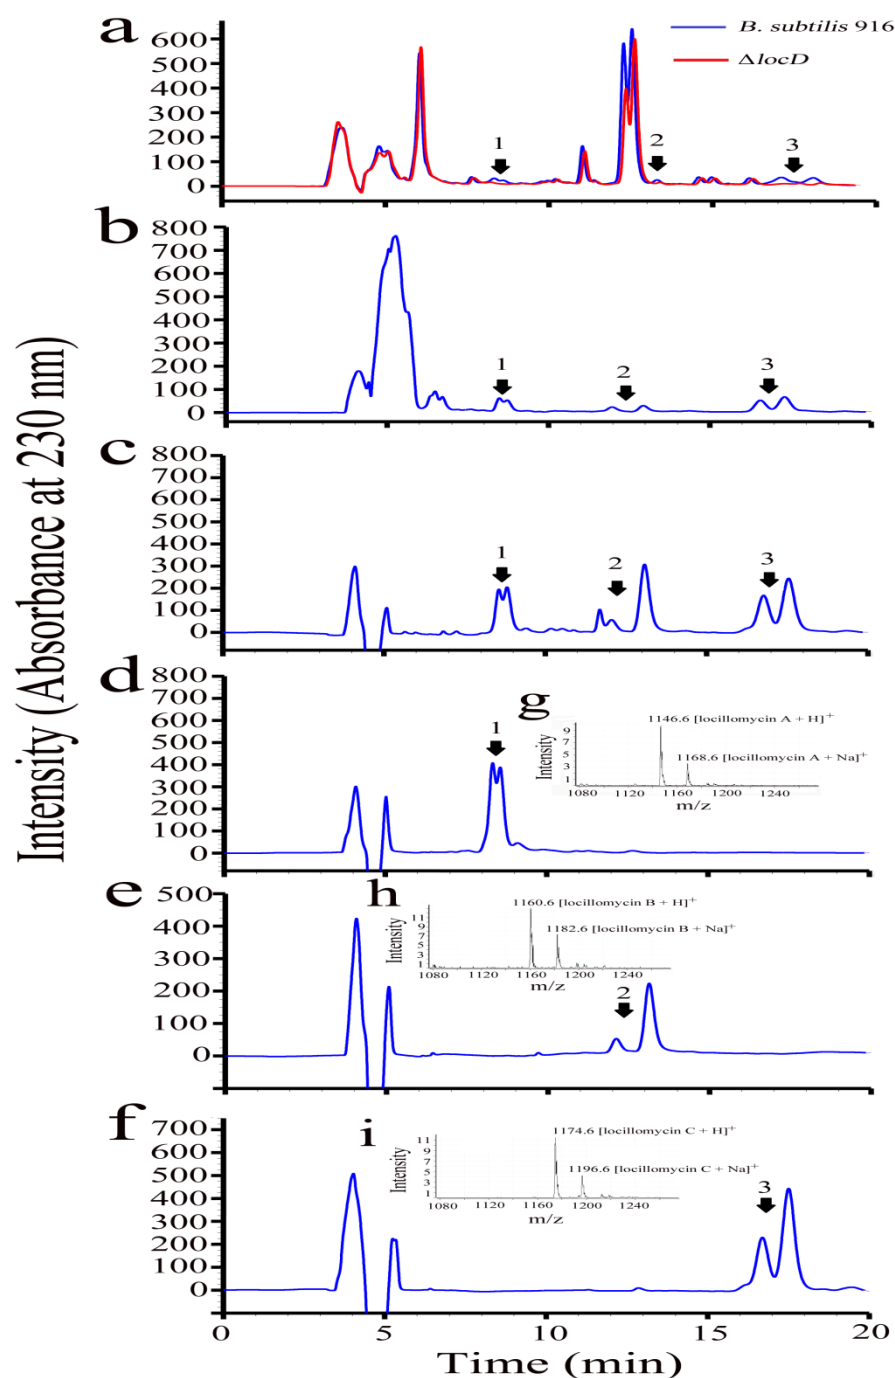

Figure S4. Isolation and purification of locillomycins. (a) HPLC analysis of the locillomycins produced by wild-type *B. subtilis* 916 (-----) and its mutant  $\Delta locD$  (-----). (b) locillomycins purified by Agilent amino solid phase extraction column. (c) locillomycins purified by Agilent C18 solid phase extraction column. (d ~ f) locillomycin A, B and C further purified by HPLC step by repetitive on a reversed-phase column (RP-18, 5  $\mu$ M, 4 $\times$ 250 mm; Merk). (g ~ i) The MS spectra of the purified locillomycin A, B and C.

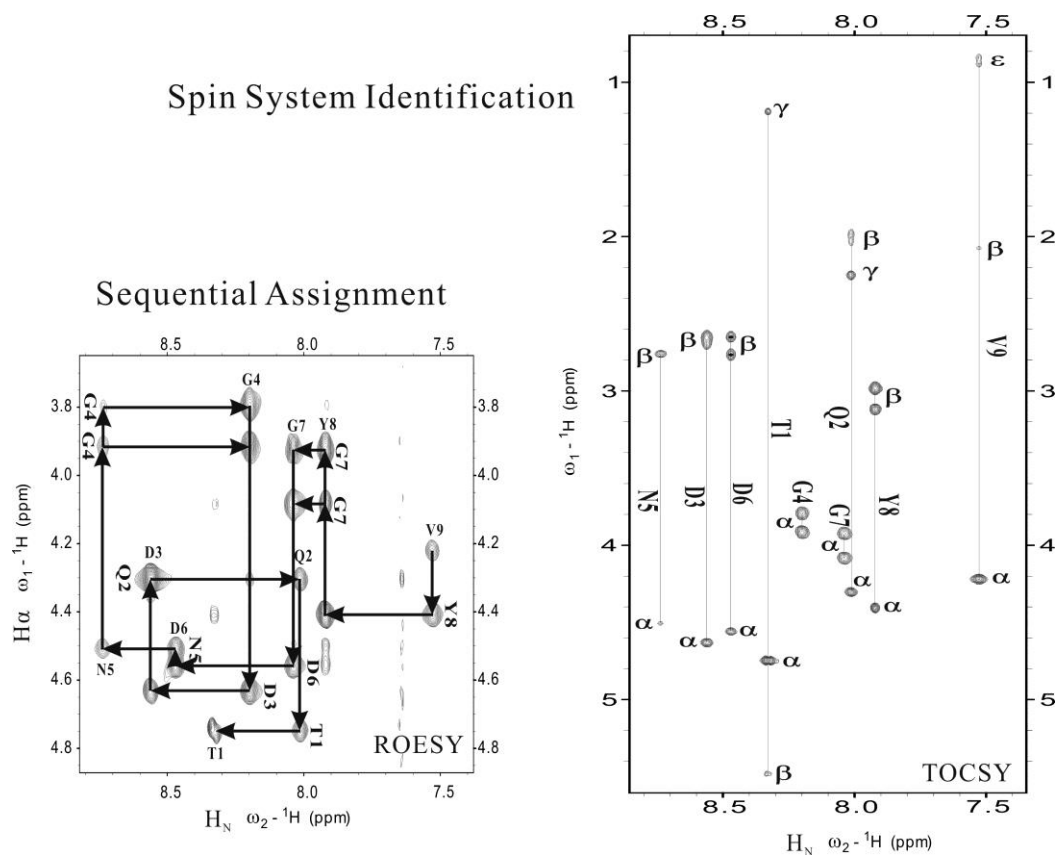

Figure S5. Sequential assignment and spin system identification of the cyclic peptide. Left panel shows the fingerprint region of the ROESY spectrum of the locillomycin C peptide moiety. Arrows show the sequential connectivity from residue V9 to T1. Intra-residues  $H_{Ni}-H_{\alpha i}$  interactions are labeled with vertical characters while the inter-residue  $H_{Ni}-H_{\alpha i-1}$  interactions are labeled with horizontal characters. Right panel shows the amide region of the TOCSY spectrum of locillomycin C. This was used to identify amino acid types through different spin system pattern. Side chain signals from each residue was connected with solid line and labeled with Greek letter and the type and number of the residue was labeled with horizontal characters.

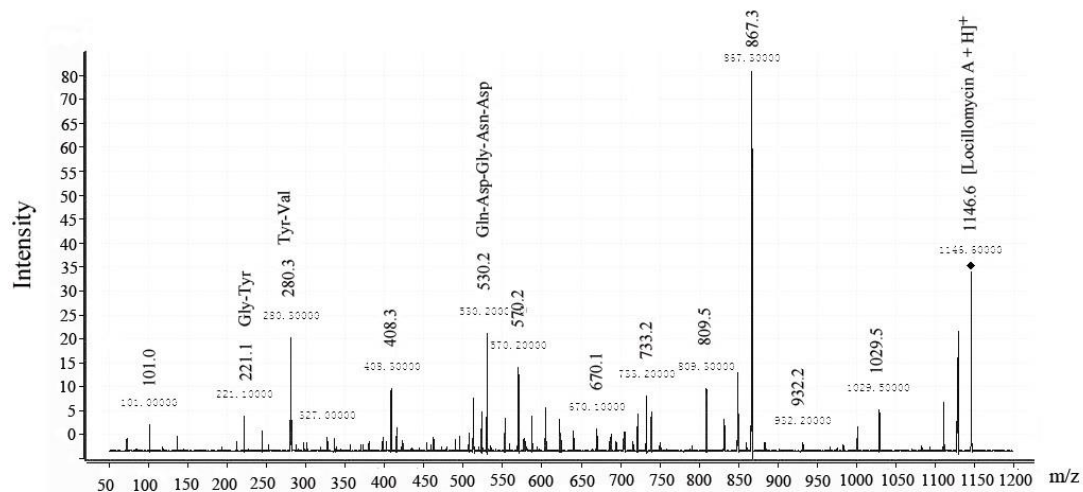

Figure S6. Tandem mass spectrum of Locillomycin A

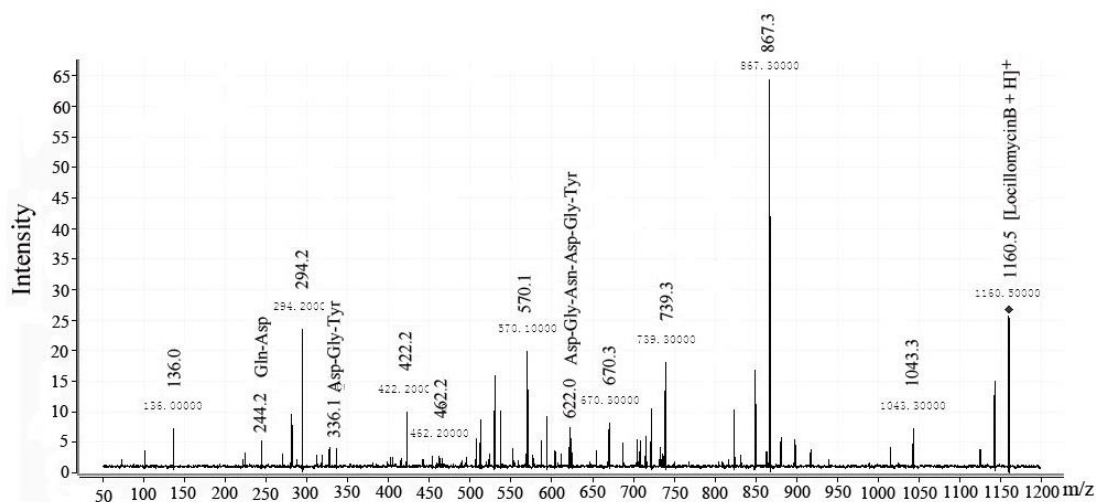

Figure S7. Tandem mass spectrum of Locillomycin B

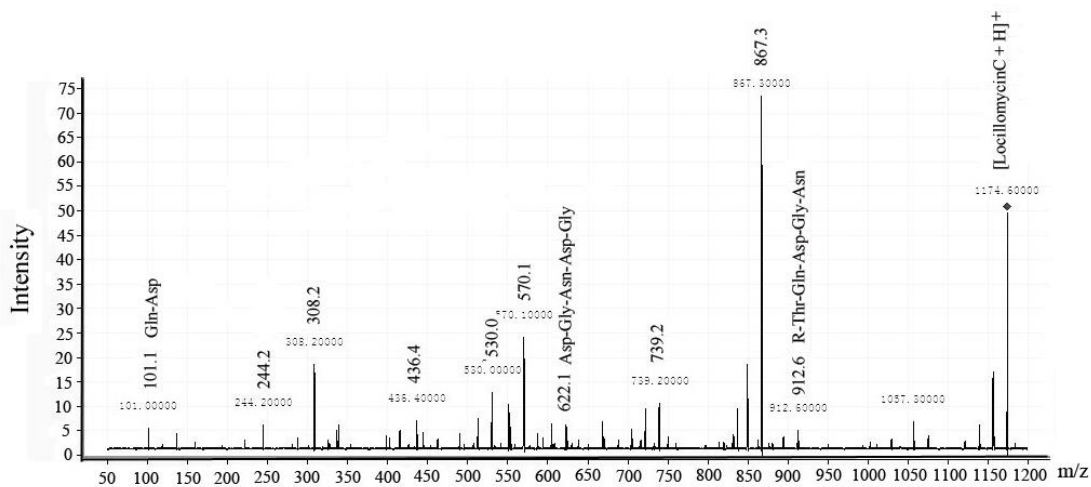

Figure S8. Tandem mass spectrum of Locillomycin C

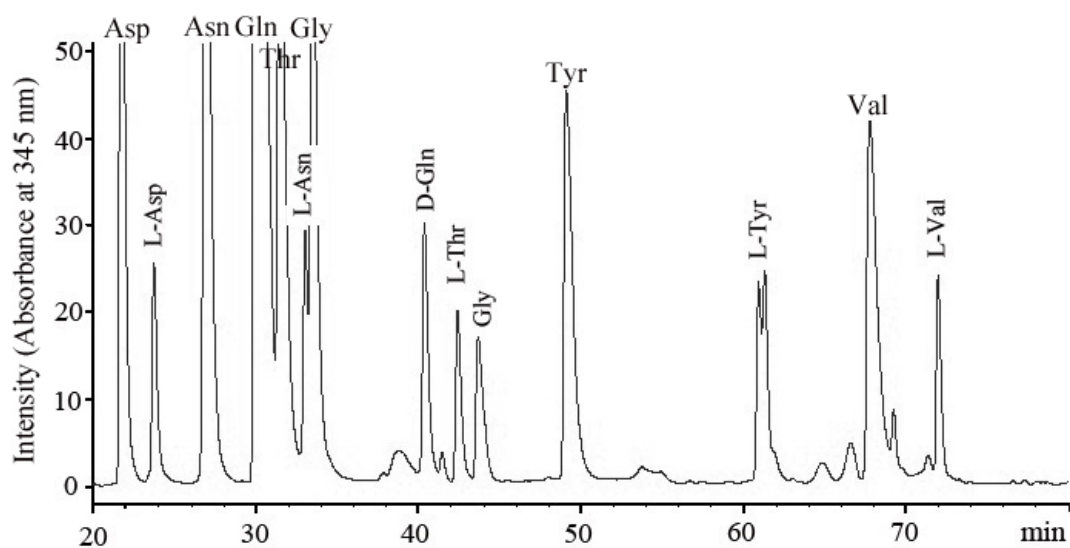

Figure S9. DL-amino acid analysis of Locillomycins by HPLC

Amino acid chirality was determined by reacting acid hydrolysates of the locillomycins with o-phthaldialdehyde (OPA) together with N-isobutyryl-L-cysteine (IBLC) as chiral reagents (detail description in “Material and Methods”). The higher peaks representing the amino acid residues reacting with OPA were labeled with a three-letter code of the corresponding amino acid. The lower peaks representing the amino acid residues reacting with both OPA and IBLC were labeled L- or D- pre three-letter code (37).

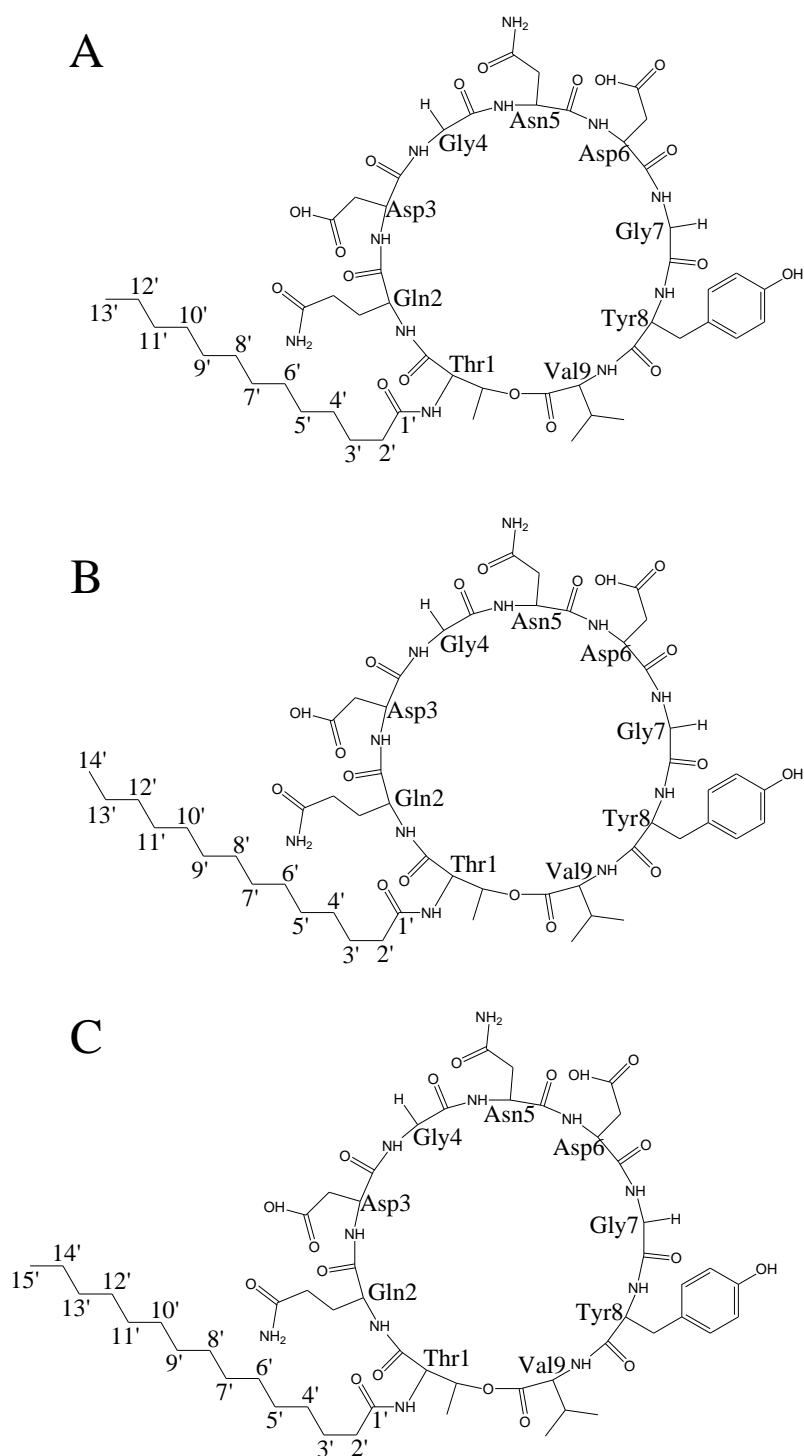

Figure S10. Chemical structures of locillomycins A, B and C

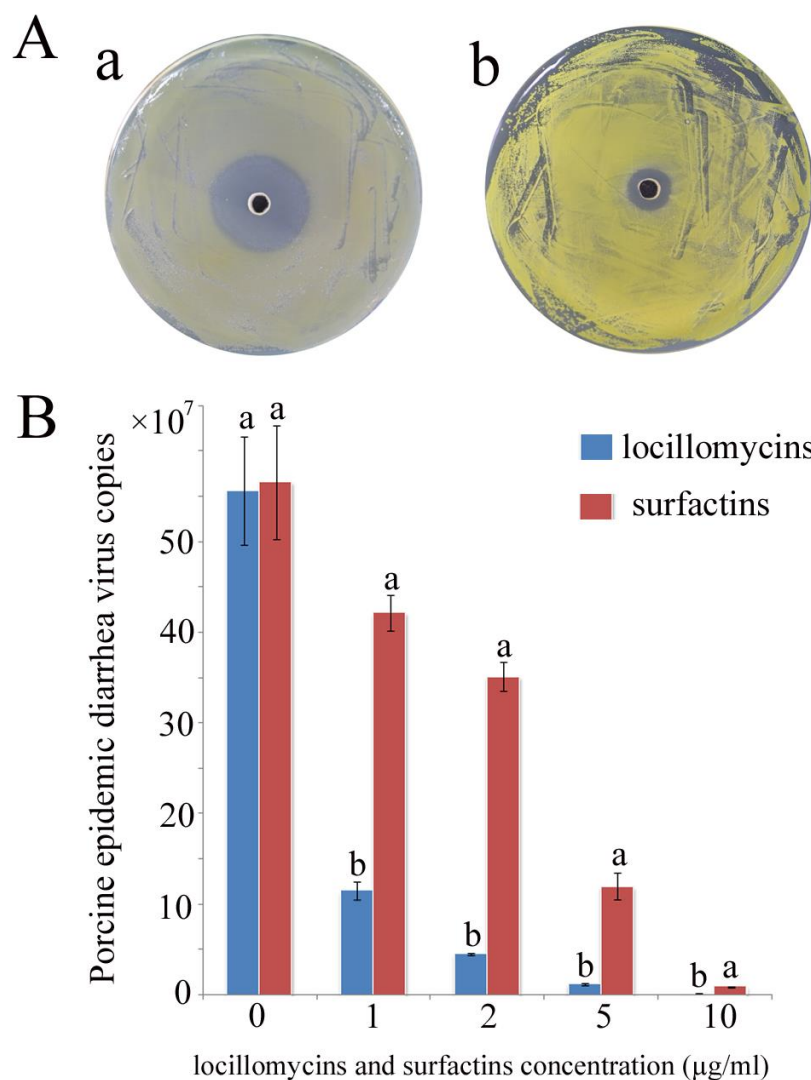

Figure S11. Antibacterial and antiviral activities of locillomycins. (A) Antibacterial activities of locillomycins against *Staphylococcus aureus* (Aa) and *Xanthomonas oryzae* pv. *Oryzae* (Ab). locillomycin, 1 mg/mL 100  $\mu\text{L}$ ; the plates were incubated at 37  $^{\circ}\text{C}$  for 24 h. (B) Antiviral activities of locillomycins against Porcine epidemic diarrhea virus (PEDV). The anti-virus experiment was designed using Porcine Epidemic Diarrhea Virus (PEDV) as an indicator; conducted on a 24-well plate containing a single layer of Vero cell in each well, which was infected with PEDV at a multiplicity of infection (MOI), and incubated at 37  $^{\circ}\text{C}$ . After 1 h, different concentrations of Locillomycins (blue column) or surfactins (red column) were introduced to treatments, and continuously incubated at 37  $^{\circ}\text{C}$  for 36 h. At the end of the experiment, RNA of the virus was extracted from the wells, and quantified with fluorescent qPCR. The results revealed that the PEDV infection could be effectively inhibited by locillomycins especially that of concentration at the 10  $\mu\text{g/mL}$ , which reduced the virus copy by 300 fold (blue column). In contrast, the PEDV infection could also be inhibited by surfactins but that of concentration at the 10  $\mu\text{g/mL}$ , which only reduced the virus copy by 30 fold (red column).

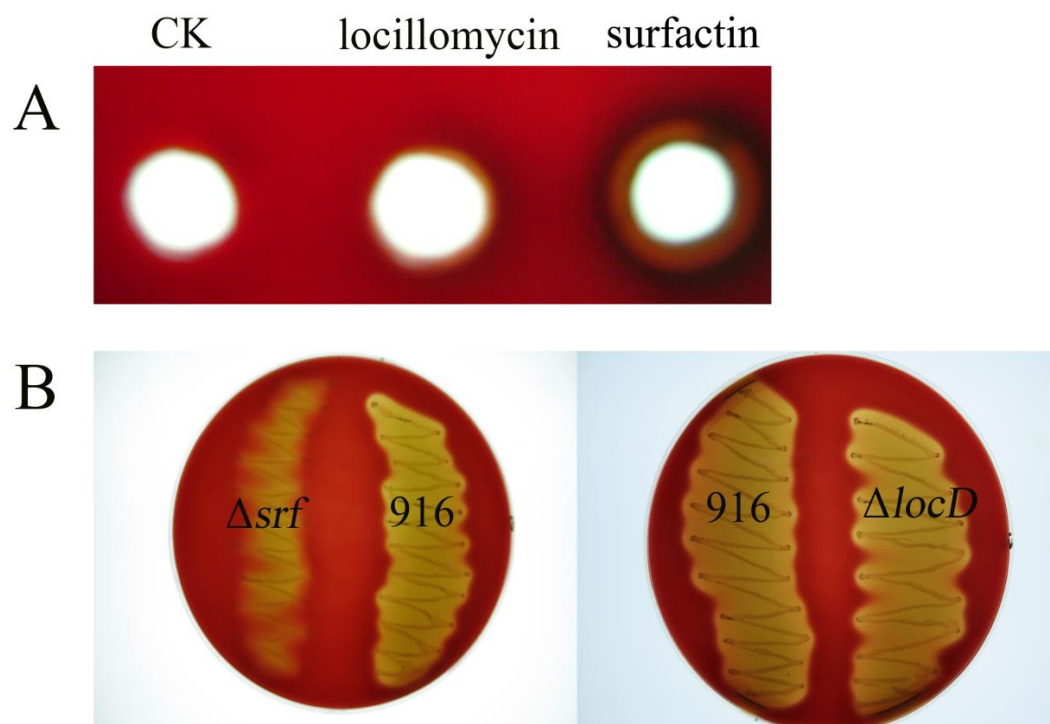

Figure S12. Haemolytic activities of locillomycins and surfactins. (A) CK, 100  $\mu$ L; locillomycin, 1 mg/mL, 100  $\mu$ L; surfactin, 1 mg/mL, 100 $\mu$ L; the plates were incubated at 37  $^{\circ}$ C for 1 – 3 days. (B) *B. subtilis* 916 and its mutants  $\Delta srf$ ,  $\Delta LocD$  were grown on blood agar plates after incubation at 37  $^{\circ}$ C for 1 – 3 days.
